# Supplementary material for: Integrative Approach to Pain Genetics Identifies Pain Sensitivity Loci across Diseases
Source: PLoS Comput Biol. 2012 Jun 7;8(6):e1002538. doi: 10.1371/journal.pcbi.1002538 (PMC3369906; doi:10.1371/journal.pcbi.1002538)
Supplement: Table S1 — Disease-specific pain index (DSPI) ranking all 2962 diseases by their respective disease-pain ratio. (XLS) [file pcbi.1002538.s005.xls]

## Sheet: pi.eutils.txt
Rank	Diseases
1	Prinzmetal's Angina
2	Unstable Angina
3	Vertebrogenic Pain Syndrome
4	Pain, Menstrual
5	Neuralgia, Atypical
6	Mechanical Low Back Pain
7	Polyarthralgia
8	Somatic Sensation Disorders
9	Postherpetic Neuralgia
10	Failed Back Surgery Syndrome
11	Piriformis syndrome
12	Slit Ventricle Syndrome
13	Causalgia Syndrome
14	Vulvar Vestibulitis
15	Pseudomelia
16	Myofascial Pain Syndromes
17	Chronic Plantar Fasciitis
18	Perineural Cysts
19	Craniomandibular Diseases
20	Vulvodynia
21	Coronary Artery Vasospasm
22	Osteochondrosis of Spine
23	Calcaneal Spur
24	Intracranial Hypotension, Spontaneous
25	Zoster Sine Eruptione
26	Myofascial Pain Syndrome, Diffuse
27	Sciatic Nerve Diseases
28	Craniofacial Pain Syndromes
29	Nerve Root Inflammation
30	Posterior Tibial Nerve Diseases
31	Post-Traumatic Headache
32	Subacromial Impingement Syndrome
33	Compression Fractures
34	Mononeuropathy Multiplex Syndrome
35	Femoral Nerve Diseases
36	Musculoskeletal Diseases
37	Alcohol-Related Autonomic Polyneuropathy
38	Epicondylitis, Lateral Humeral
39	Hematocolpos
40	Deficiency Disease, Alpha-Aminoadipic Semialdehyde
41	Wandering Spleen
42	Anterior Knee Pain Syndrome
43	Disk Prolapse
44	Tension Headache
45	Chronic Interstitial Cystitis
46	Trigeminal Nerve Disorders
47	Osteoarthritis, Knee
48	Osteoarthritis, Lumbar
49	Temporomandibular Joint Diseases
50	Costen's Syndrome
51	Cranial Nerve IX Disorders
52	Headache Syndromes
53	De Quervain Stenosing Tenosynovitis
54	Cholecystitis, Emphysematous
55	Spondylolysis
56	Sudek's Atrophy
57	Burning Mouth Syndrome
58	Disc Degeneration
59	Trigeminal Autonomic Cephalalgias
60	Myocardial Bridging
61	Parsonage-Aldren-Turner Syndrome
62	Vascular Headache
63	Spinal Stenosis
64	Esophageal Spasm
65	Cranial Nerve Eleven Diseases
66	Fothergill Disease
67	Hematometra
68	Colitis, Mucous
69	Spinal Subdural Hematoma
70	Shingles
71	Tendonitis
72	Abnormality, Torsion
73	Nerve Compression Syndromes, External
74	Dentin Hypersensitivity
75	Paroxysmal Hemicrania
76	Teeth Grinding Disorder, Nocturnal
77	Hypohidrosis
78	Tenovaginitis, Stenosing
79	Hemorrhage, Spinal Epidural
80	Dercum Disease
81	Coxarthrosis
82	Cranial Extradural Abscess
83	Spinal Diseases
84	Acute Chest Syndrome
85	Tolosa-Hunt Syndrome
86	Spondylisthesis
87	X Syndrome, Angina
88	Dientamoebiasis
89	Acute Coronary Syndrome
90	Hyper-IgD Syndrome
91	Esophageal Dysmotility
92	Neuroma
93	Spondylosis
94	PNS Diseases
95	Splenic Infarction
96	Capsulitis, Adhesive
97	Chondritis, Costal
98	Chronic Pancreatitis
99	Injury, Repetition Strain
100	Diskitis
101	Phlebitis, Lateral Sinus, Septic
102	Chondromalacia Patellae
103	Teeth Grinding Disorder
104	Synovitis, Acne, Pustlosis, Hyperostosis, and Osteomyelitis
105	Alstrom's Syndrome
106	Migraine Headache
107	Volvulus
108	Inflammation, Spinal Cord
109	Post-Concussion Symptoms
110	Sphenoidal Sinusitis
111	Functional Colonic Diseases
112	Familial Cold Urticaria
113	Secondary Headache Disorders
114	SUNCT Syndrome
115	Sensation Disorders
116	Infarction, Pulmonary
117	Prostatitis
118	Hemorrhoids
119	Dissection, Anterior Spinal Artery
120	Giant Osteoid Osteoma
121	Liposclerotic Mesenteritis
122	Migraine, Common
123	Focal Seizure Disorder, Sensory
124	Cecitis
125	Inflammation, Endodontic
126	Vertebral Artery Dissection, Spontaneous
127	Pyometra
128	Benign Exertional Headache
129	Tarsal Tunnel Tibial Neuropathy
130	Sphincter of Oddi Dysfunction
131	Ureterolithiasis
132	Mononeuropathy, Diabetic
133	Chronic Cluster Headache
134	Vulvar Diseases
135	Periarthritis
136	Erythermalgia
137	Hereditary Sensory Autonomic Neuropathy, Type 1
138	Apoplexy, Pituitary
139	Arthritis, Degenerative
140	Scheuermann Kyphosis
141	Hyperamylasemia
142	Pyomyositis
143	Carotid Artery Dissection, Internal
144	Anomalous Cervical Rib Syndrome
145	Trigger Thumb
146	Infection, Pelvic
147	Bone Malposition
148	Vulvitis
149	Neuropathy, Subacute Combined Degeneration
150	Alveolar Osteitis
151	Arthritis, Spinal
152	Osteoma, Osteoid
153	Ganglionic Cysts
154	Acute Porphyria
155	Ileus
156	Endometriosis
157	Thalamic Diseases
158	Chondromatosis
159	Mesenteric Lymphadenitis
160	Coronary Stenoses
161	Perforated Appendicitis
162	Inguinal Hernia
163	Osteophytosis, Spinal
164	Cranial Nerve Disorders
165	Spinal Neoplasms
166	Post-Cholecystectomy Syndrome
167	Anisakiasis
168	Giant Cell Thyroiditis
169	Ileocecal Syndrome
170	Joint Diseases
171	Infarction
172	Degos Syndrome
173	Neuropathy, Median
174	Fibular Nerve Diseases
175	Uterine Perforation
176	Neuritis, Peripheral
177	Mesenteric Vascular Occlusion
178	Koehler's Disease
179	Polyradiculopathy
180	Acute Cholecystitis
181	Wallenberg's Syndrome
182	Intracranial Hypertension, Benign
183	Tako-tsubo Cardiomyopathy
184	Median Neuropathy, Carpal Tunnel
185	Pyogenic Iliopsoas Abscess
186	Trismus
187	Heart Disease, Ischemic
188	Benign Recurrent Abducens Palsy, Children
189	Thrombosis, Coronary
190	Mesothelioma, Cystic
191	Coronary Heart Disease
192	Brachial Plexus Diseases
193	Bruns' Gait Apraxia
194	Hyperkinetic Heart Syndrome
195	Spondylarthropathy
196	Anterior Tibial Syndrome
197	Fractures, Abnormal Union
198	Adnexal Diseases
199	Schnitzler Syndrome
200	Phlebitis, Sagittal Sinus, Septic
201	Herpes Zoster Auricularis
202	Arachnoid Membrane Inflammation
203	Tibial Tendon Dysfunction, Posterior
204	Arteriolosclerosis
205	Urachal Cyst
206	Extramedullary Spinal Cord Compression
207	Cavernous Sinus, Phlebitis, Septic
208	Gouty Arthritis
209	Hernia, Abdominal
210	Post-Poliomyelitis Muscular Atrophy
211	Myocardial Infarct
212	SC Disease
213	Ureteral Calculus
214	Epidural Tumors
215	Aperture Syndrome, Thoracic Outlet
216	Peripheral Nerve Neoplasms
217	Acro-Osteolysis Syndromes
218	Peritoneal Diseases
219	Splenosis
220	Spondylitis
221	Cholecystolithiasis
222	Eyestrain
223	Myopathic Conditions
224	Premenstrual Syndrome
225	Infections, Central Nervous System, Parasitic
226	Livedo Reticularis
227	Herpes Zoster, Ocular
228	Brown-Sequard Disease
229	Hereditary Angioneurotic Edema
230	Intermittent Claudication
231	Dilatation, Pathological
232	Sickle Cell Anemia
233	Cecal Diseases
234	Encephalopathy, Hypertensive
235	Hemorrhage, Retrobulbar
236	Anterior Optic Neuritis
237	Fracture, Pathological
238	Biliary Dyskinesia
239	Mediterranean Fever, Familial
240	Rupture, Spontaneous
241	Hereditary Coproporphyria
242	Subdural Hematoma, Chronic
243	Cranial Airocele
244	Foot Diseases
245	Ischemic Colitis
246	Bernard's Syndrome
247	Leptomeningeal Cysts
248	Pancoast's Syndrome
249	Ulnar Nerve Diseases
250	Sternocostoclavicular Hyperostosis
251	Infection, Enterobius vermicularis
252	Subclavian Steal Phenomenon
253	Lyme Borreliosis, Nervous System
254	Porphyria Variegate
255	Ileal Diseases
256	Spinal Cord Syphilis
257	Dental Pulp Disease
258	Polyneuropathy, Inherited
259	Glomus Tumor
260	Ovarian Diseases
261	Jejunal Diseases
262	Henderson-Jones Syndrome
263	Aneurysm, Coronary
264	Fascitis
265	Giant Cell Aortitis, Horton's
266	Cardiac Sinus Pause
267	Actinic Keratosis
268	Inferior Myocardial Infarction
269	Kienboeck Disease
270	Coronary Occlusion
271	Radial Nerve Diseases
272	Twelfth Cranial Nerve Disorder
273	Abortion, Incomplete
274	Leptomeningeal Carcinomatosis
275	Esophageal Diseases
276	Thoracic Diseases
277	Type I Arnold-Chiari Malformation
278	Synovitis, Pigmented Villonodular
279	Arthritis
280	Dysreflexia, Autonomic
281	Compartment Syndromes
282	Infarctions, Brain Stem
283	Rathke's Cleft Cysts
284	Osteochondritis Dissecans
285	Emphysema, Mediastinal
286	Parovarian Cyst
287	Inflammatory Disease, Pelvic
288	Arteriosclerosis, Coronary
289	Diffuse Idiopathic Skeletal Hyperostosis
290	Cast Syndrome
291	Fallopian Tube Diseases
292	Myelosyringosis
293	Acalculous Gallbladder Inflammation
294	Fabry's Disease
295	Bechterew's Disease
296	Osteochondritis
297	Bone Cysts, Aneurysmal
298	Vaginal Discharge
299	Coronary Restenosis
300	Paraneoplastic Neuropathy
301	Urinary Lithiasis
302	Apolipoprotein B Deficiency Disease
303	Diverticulitis
304	Autolysis, Dental Pulp
305	Ureteral Diseases
306	Melorheostosis
307	Tuberculosis, Peritoneal
308	Intestinal Perforation
309	Intususception
310	Menstruation Disorders
311	Meckel's Diverticulum
312	Alcoholic Pancreatitis
313	Central Nervous System Schistosomiasis
314	Testicular Torsion
315	Indigestion
316	Granulomatosis, Lipid
317	Purpura, Nonthrombopenic
318	Volkmann's Ischemic Contracture
319	Borderline Lepromatous
320	Abscess, Abdominal
321	Splanchnoptosis
322	Bone Spur
323	Basilar Migraine
324	Neoplasms, Bone
325	Fibrous Dysplasia, Monostotic
326	Neoplasms, Spinal Cord
327	Mucositis
328	Spinal Cord Disorders
329	Gastric Dilation
330	Cystic Hygroma Colli
331	Charcot's Joint
332	Hypermenorrhea
333	Exostosis
334	Sigmoid Colon Diseases
335	Dissecting Aneurysm
336	Inflammatory Pseudotumor of Orbit
337	Hereditary Sensory Neuropathy, Dominant, Type 3
338	Testicular Diseases
339	Stove-in Chest
340	Abscess, Retropharyngeal
341	Pneumoperitoneum
342	Angiolipoma
343	Central Nervous System Angiitis
344	Angioneurotic Edema
345	Fibrosis, Inflammatory Perianeurysmal
346	Epididymal Cyst
347	Tooth Diseases
348	Psoriasis Arthropathica
349	Equine Diseases
350	Leukoencephalopathy Syndrome, Posterior
351	Diseases, Occupational
352	Jactatio Capitis Nocturna
353	Thrombus, Intracranial
354	Cellulitis, Pelvic
355	Cranial Sinus Thrombosis
356	Pyogenic Hepatic Abscess
357	Inflammation
358	Periodontitis, Apical
359	Fructose Metabolism, Inborn Errors
360	Vascular Diseases, Spinal Cord
361	Adamantinoma
362	Neoplasms, Perivascular Epithelioid Cell
363	Pustulosis, Exanthematous, Acute Generalized
364	Regurgitation, Gastric
365	Cartilage Diseases
366	Chondrosteoma
367	Forestier-Certonciny Syndrome
368	Ochronosis
369	Subependymal Astrocytoma
370	Anus Diseases
371	Hemangioendothelioma, Epithelioid
372	Bone Inflammation
373	Glenohumeral Subluxation
374	Vagus Nerve Motor Disorder
375	Encephalitis, Herpes Zoster
376	Gastrointestinal Disorders, Functional
377	Double Vision
378	Cyst, Common Bile Duct
379	Ekbom's Syndrome
380	Sleep Disorders
381	Female Genital Diseases
382	Osteolysis
383	Tenosynovitis
384	Isolated Non-compaction of the Ventricular Myocardium
385	Infections, Blastocystis
386	Afferent Loop Syndrome
387	Ulnar Nerve Compression
388	Cavernous Angioma, Central Nervous System
389	Pachydermoperiostosis
390	Phonation Disorders
391	Central Nervous System Systemic Lupus Erythematosis
392	Intestinal Pseudo-Obstruction, Idiopathic
393	Puerperal Disorders
394	Colonic Diverticulitis
395	Mouth Ulcer
396	Dropsy
397	Cysticercosis, Brain
398	Bone Diseases, Endocrine
399	Meibomian Cyst
400	Niemann-Pick Disease, Adult Non-Neuronopathic
401	Hematoma
402	Rheumatism
403	Lactose Malabsorption
404	Synovitis
405	Gall Bladder Diseases
406	Tuberculoid Leprosy
407	Geographic Tongue
408	Volvulus, Stomach
409	Cellulitis, Orbital
410	Embryonic Artery, Persistent, Cerebral
411	Pancreatitis
412	Syncope, Stokes-Adams
413	Constriction, Pathological
414	Legg-Calv√©-Perthes Syndrome
415	Adenomyoma
416	Glomus Tympanicum Tumor
417	Breast Diseases
418	Melena
419	Hemangioblastoma
420	Hereditary Fructose Intolerance
421	Akathisia
422	Intestinal Obstruction
423	Systemic Mast-Cell Disease
424	Hemorrhages, Postoperative
425	Rectal Diseases
426	Nervous System Disorders
427	Vertigo, Central Nervous System Origin
428	Salpingitis
429	Fatigue Syndrome, Postviral
430	Hernia
431	Leriche's Syndrome
432	Porphyria, Hepatic
433	Posterior Longitudinal Ligament Calcification
434	Sickle Cell Trait
435	Peyronie Disease
436	Hemiparesis
437	Infections, Torovirus
438	Mesothelial Neoplasms
439	Sarcoma, Neurogenic
440	Aseptic Meningitis
441	Paget Disease of Bone
442	Adult-Onset Still Disease
443	Leiomyomatosis
444	Calcification, Dental Pulp
445	Sleep Disorder, Environmental
446	Gastric Stasis
447	Paraphimosis
448	Labor Complications
449	Abscess, Periapical
450	Subdural Hematoma
451	Ovarian Cysts
452	Connective and Soft Tissue Neoplasms
453	Juvenile-Onset Stills Disease
454	Papilledema Associated with Decreased Intraocular Pressure
455	Rheumatoid Arthritis
456	Myelolipoma
457	Subdural Hematoma, Acute
458	Subdural Empyema
459	Digestive System Diseases
460	Uterine Diseases
461	Hemarthrosis
462	Periapical Diseases
463	Abdominal Pregnancy
464	Colonic Diverticulosis
465	Aphthae
466	Postinfectious Myelitis
467	Mucositis, Oral
468	Pott's Disease
469	Ossification, Ectopic
470	Bone Hypertrophy
471	Lead-Induced Polyneuropathy
472	External Ophthalmoplegia
473	Postpericardiotomy Syndrome
474	Takayasu Syndrome
475	Bornholm Disease
476	Infections, Bacterial, Central Nervous System
477	Cancer, Jejunal
478	Confusion, Post-Ictal
479	Movement Disorder Syndromes
480	Nervous System Invasive Aspergillosis
481	Demyelinating Polyradiculoneuropathy, Acute Inflammatory
482	Extramedullary Myeloid Cell Tumor
483	Hemiplegia, Crossed
484	Breakthrough Bleeding
485	Venous Hypertension Ulcers
486	Intestinal Lymphangiectasis
487	Avascular Necrosis of Femur Head
488	Tropical Eosinophilia
489	Calculosis
490	Gulf War Syndrome
491	Cholesterol Embolism
492	Pseudoobstruction, Colonic
493	Femoral Neoplasms
494	Infections, Fusobacterium
495	Colorado Tick Fever
496	Nephrolithiasis
497	Hypersalivation
498	Colonic Diseases
499	Primary Empty Sella Syndrome
500	Periostitis
501	Oophoritis
502	Meningeal Herniation
503	Miller-Fisher Syndrome
504	Syphilitic Aortitis
505	Prosthesis Loosening
506	Gastric Rupture
507	Abscess, Periodontal
508	Bone Diseases
509	ANS Diseases
510	Intestinal Diseases
511	Cancer of the Pelvis
512	Tubal Pregnancy
513	Xanthogranulomatous Pyelonephritis
514	Allergic Angiitis
515	Spinal And Bulbar Muscular Atrophy, X-Linked 1
516	Hereditary Autoinflammation Diseases
517	Gastric Outlet Obstruction
518	Serositis
519	Diffuse Scleroderma
520	Cystadenoma, Papillary
521	Ventral Hernia
522	Periarteritis Nodosa
523	Bends
524	Chondrocalcinosis
525	Urogenital Prolapse
526	Sneddon-Champion Syndrome
527	Pneumatosis Cystoides Intestinalis
528	Infections, Alphavirus
529	Neurologic Ambulation Disorders
530	Ischemic Myelopathy
531	Raynaud's Disease
532	Sinusitis, Maxillary
533	Primary Cutaneous CD30-positive Large T-Cell Lymphoma
534	Steatonecrosis
535	Chondroblastoma
536	Tumor Royale
537	Pharyngitis
538	Ethmoidal Sinusitis
539	Complication, Postoperative
540	Neoplasms, Cecal
541	Hydrarthrosis
542	Uterine Rupture
543	Facioscapulohumeral Atrophy
544	Mouth and Tooth Diseases
545	Exanthem
546	Neoplasms, Muscle
547	Male Genitourinary Diseases
548	Venous Stasis Syndrome
549	Peptic Ulcer Perforation
550	Ileitis
551	Female Genitourinary Diseases
552	Central Nervous System Tuberculosis
553	Ruptured Aneurysm
554	Empyema, Gall Bladder
555	Angiomyolipoma
556	Mountain Sickness
557	Biliary Tract Diseases
558	Bone Diseases, Infectious
559	Vascular Graft Occlusion
560	Osteopoikilosis
561	Physiological Stress
562	Ischemia
563	Gastrointestinal Tuberculosis
564	Glossitis
565	Fibromuscular Dysplasia
566	Gastro-Esophageal Reflux
567	Fractures, Ununited
568	Paranasal Sinus Diseases
569	Oculomotor Nerve Palsy
570	Frommel Disease
571	Cheney Syndrome
572	Orofacial Granulomatosis
573	Leg Ulcer
574	Aortitis
575	Mitral Valve Prolapse Syndrome
576	Abdominal Neoplasms
577	Lichen Planus, Oral
578	Neurotrophic Muscular Atrophy
579	Hemoglobin-C Disease
580	Splenic Diseases
581	Paralysis, Legs
582	Cancer of ILEUM
583	Syndrome
584	Neurilemoma
585	Neoplasms, Skull Base
586	Hyperlipoproteinemia Type V
587	Sick Building Syndrome
588	Canine Hip Dysplasia
589	Myosarcoma
590	Neoplasms, Infratentorial
591	Renal Calculus
592	Ruptured Aortic Aneurysm
593	Deficiency, Muscle Phosphofructokinase
594	Foot Ulcer
595	Abnormal Movements
596	Drug-Induced Akathisia
597	Esophagitis
598	Trochlear Nerve Disorders
599	Uterine Bleeding
600	Bladder Diseases
601	Glaucoma, Neovascular
602	Osteomalacia
603	Lip Diseases
604	Common Bile Duct Diseases
605	Fournier's Disease
606	Sinusitis, Frontal
607	Mouth Diseases
608	Brain Autoimmune Demyelinating Diseases
609	Seroma
610	Venous Insufficiency
611	Hemopneumothorax
612	Posterior Cerebral Artery Embolic Infarction
613	Inflammatory Muscle Diseases
614	Clear Cell Ependymoma
615	Ventricular Septal Rupture
616	Pectus Excavatum
617	Peritonitis
618	Neoplasms, Benign
619	Chronic Inflammatory Demyelinating Polyradiculoneuropathy
620	Pericoronitis
621	Sinus Tachycardia
622	Ureteral Obstruction
623	Cystadenoma, Mucinous
624	Hypervitaminosis A
625	Ganglia, Intra-Osseous
626	Age-Related Osteoporosis
627	Vaginal Diseases
628	Trichobezoars
629	Morgagni-Stewart-Morel Syndrome
630	Peripheral Nerve Sheath Tumors, Malignant
631	Primary Brain Stem Neoplasms
632	Multiple Pulmonary Nodules
633	Angioleiomyoma
634	Porphyria, Erythrohepatic
635	Frey's Syndrome
636	Bilateral Nasal Obstruction
637	Sinusitis
638	Pars Planitis
639	MacLeod Syndrome
640	Esophageal Hernia
641	Bleb
642	Granuloma, Respiratory Tract
643	Sinus Histiocytosis with Massive Lymphadenopathy
644	Deficiency, Yang
645	Neurocytoma
646	Demyelinating Autoimmune Disease, Peripheral
647	Viral Skin Diseases
648	Ectopic Pregnancy
649	Asialia
650	Pharynx Diseases
651	Dyspnea, Paroxysmal
652	Papilloma of Choroid Plexus
653	Dysautonomia
654	Biliary Tract Hemorrhage
655	Duodenal Diseases
656	Duodenitis
657	Cystitis
658	Neuroectodermal Tumors
659	Vascular Skin Diseases
660	Calciphylaxes
661	Hemorrhagic Fever, Dengue
662	Cholelithiasis
663	Osteosarcoma, Juxtacortical
664	Carotid Artery-Cavernous Sinus Fistula
665	Hemorrhage, Intracranial
666	Iatrogenic Disease
667	Peutz-Jegher's Syndrome
668	Pilonidal Cyst
669	Hypersomnia, Posttraumatic
670	Anterior Circulation Infarction, Brain
671	Male Genital Diseases
672	Purpura
673	Neoplasms, Cranial Nerve
674	Herpes Simplex, Labial
675	Apnea, Central
676	Conjunctival Diseases
677	False Aneurysm
678	Isaacs' Syndrome
679	Microscopic Colitis
680	Malignant Fibrous Histiocytoma
681	Bundle-Branch Block
682	Placenta Accreta
683	Stiffman Syndrome
684	Papulosquamous Skin Diseases
685	Glaucoma, Angle Closure
686	Hyperplasia, Focal Nodular
687	Abscess
688	Varix
689	Maffucci Syndrome
690	Caroli's Syndrome
691	HELLP Syndrome
692	Pericarditis
693	Amyloid Polyneuropathies
694	Cardiac Aneurysm
695	Psychic Denial of Blindness
696	Lipodystrophy, Intestinal
697	Emphysema, Subcutaneous
698	Otological Diseases
699	Pancreatic Pseudocyst
700	ADPKD
701	Chlamydophila Infections
702	Aneurysm, Aortic
703	Channelopathies
704	Cholelithiasis, Common Bile Duct
705	Deficiency, Muscle Phosphorylase
706	Neonatal Hypotonia
707	Inversion of Uterus
708	Limited Systemic Scleroderma
709	Leukemic Infiltration
710	Seventh Cranial Nerve Diseases
711	Encephalomyelitis, Necrotizing Hemorrhagic
712	Endometrial Stromal Sarcoma
713	Oppenheim's Disease
714	Fibromyoma
715	Urination Disorders
716	Vascular Diseases
717	Hypertrophic Osteoarthropathy, Secondary
718	Foot Dermatosis
719	Death, Sudden
720	Exposure, Dental Pulp
721	Sex Disorders
722	Prolactin-Producing Pituitary Adenoma
723	Fascitis, Necrotizing
724	Pneumopericardium
725	Dysphagia
726	Epididymitis
727	Biological Clock Disturbances
728	Dry Eye Syndromes
729	Aneurysm, Iliac
730	Trichorhinophalangeal Syndrome with Exostoses
731	Post-Traumatic Neoplasms
732	Abdominal Aortic Aneurysm
733	Chondrosarcoma, Mesenchymal
734	Infantile Sialic Aid Storage Disorder
735	Mitochondrial Myopathy, Lactic Acidosis, Stroke-Like Episode
736	Laryngeal Spasm
737	Diverticulosis
738	Basilar Artery Ischemia
739	Epiphysiolysis
740	Arthritides, Bacterial
741	Ascites, Chylous
742	Cystadenoma, Serous
743	Aortic Arch Syndromes
744	Urological Diseases
745	Pathologic Calcification
746	Neuroepithelial Neoplasms
747	Pneumothorax
748	Complication, Intraoperative
749	Acute Idiopathic Facial Neuropathy
750	Jaw Diseases
751	Thoracoabdominal Aortic Aneurysm
752	Alkaptonuria
753	Pineal Parenchymal Tumors
754	Prostatic Diseases
755	Fibroepithelial Neoplasms
756	Chordoma
757	Lipomata
758	Neoplasms, Appendiceal
759	Gynatresia
760	Clarkson Disease
761	Aortic Supravalvular Stenosis
762	Otorhinolaryngologic Disease
763	Esophageal Perforation
764	Colitis
765	Osteomyelitis
766	Osteochondromatosis
767	Infections, Actinomyces
768	Ludwig's Angina
769	Adynamia Episodica Hereditaria
770	Plasma Cell Granuloma
771	Neoplasms, Maxillary Sinus
772	Arterial Obstructive Diseases
773	Retroperitoneal Neoplasms
774	Osteoporosis, Post-Menopausal
775	Mandibular Diseases
776	Chronic Illness
777	Chilblains
778	Skin Ulcer
779	Giant Cell Tumor of Bone
780	Foreign-Body Granuloma
781	Tongue Diseases
782	Cryptococcal Meningitis
783	Chemical Sensitivities, Multiple
784	Vasomotor Rhinitis
785	Corneal Arcus
786	Ankylosis
787	Ascariasis
788	McCune-Albright Syndrome
789	Gout
790	Hip Contracture
791	Arteriosclerosis Obliterans
792	Taste Disorders
793	Cacchi-Ricci Syndrome
794	Diseases, Peripheral Vascular
795	Acute Necrotizing Pancreatitis
796	Ascaridiasis
797	Familial Hyperchylomicronemia
798	Blue Toe Syndrome
799	Follicular Dendritic Cell Sarcoma
800	Phlebitis
801	Male Breast Enlargement
802	Galactorrhea
803	Complications, Pregnancy
804	Cardiac Complex, Premature
805	Leukocytosis
806	Neoplasms, Cystic, Mucinous, and Serous
807	Jackson-Lawler Type Pachyonychia Congenita
808	Nasal Disorders
809	Myocardial Hibernation
810	Pleuritis
811	Kidney Diseases
812	Peritoneal Neoplasms
813	Cardiac Arrest, Sudden
814	Vulvovaginitis
815	Ovarian Hyperstimulation Syndrome
816	Bradyarrhythmias
817	Infections, Dioctophyma renale
818	Neoplasms, Vascular
819	Adenosarcoma
820	Hypertensive Hemorrhage, Cerebral
821	Abscess, Hepatic
822	Bile Duct Diseases
823	Amoebiasis, Hepatic
824	Cancer of the Fallopian Tube
825	Familial Dystonia, Autosomal Dominant
826	Adenomatoid Tumor
827	Adenoma, Chromophobe
828	Bacterial Overgrowth Syndrome
829	Spastic Tetraplegia
830	Herditary Sensory and Motor Neuropathy
831	Milk Allergy
832	Rigidity, Decerebrate
833	Prolapse
834	Deficiency, Yin
835	Nesidioblastosis of Pancreas
836	Equine Strongyle Infections
837	Rhabdomyolysis
838	Respiration Disorders
839	Mercurial Neuroanesthenia
840	Sialoliths
841	Gorham Disease
842	Thyrotoxicosis
843	Rectal Prolapse
844	Fibromatosis, Abdominal
845	CNS Diseases
846	Postphlebitic Disease
847	Cardiac Rupture, Post-Infarction
848	Infundibular Stenoses, Pulmonary
849	Ulcer
850	Pheochromocytoma
851	Suppurative Hidradenitis
852	Neurilemmoma, Acoustic
853	Shock, Cardiogenic
854	Intracranial Hematoma, Traumatic
855	Scrotal Hydrocele
856	Duodenal Obstruction
857	Thromboangitis Obliterans
858	Erythema Nodosum
859	Cavernous Hemangioma
860	Basal Ganglionic Hemorrhage
861	Day Blindness
862	Salivary Calculus
863	Arterial Inflammation
864	Aneurysm
865	Intracranial Tuberculoma
866	External Otitis
867	Uterine Cervix Erosion
868	Left Ventricular Dysfunction
869	Myoclonic Epilepsy and Ragged Red Fibers
870	Cardiac Diseases
871	Bone Marrow Diseases
872	Crow-Fukase Syndrome
873	WAGR Complex
874	Attrition, Dental
875	Osteoma
876	Scleritis
877	Duodeno-Gastric Reflux
878	Ehlers-Danlos Disease
879	Bazin Disease
880	Pyelitis
881	Orbital Diseases
882	Gas Gangrene
883	Radiation Recall Reaction
884	Curling's Ulcer
885	Fibrous Tissue Neoplasms
886	GM2 Gangliosidosis
887	Arrythmia
888	Osteitis Fibrosa Disseminata
889	Rare Diseases
890	Deep-Vein Thrombosis
891	Hemorrhage, Oral
892	Fifth Disease
893	Behcet's Syndrome
894	Tetany
895	Pancreatic Insufficiency
896	Hemangioma, Capillary
897	Mediastinal Cyst
898	Porphyria
899	Lipomatosis
900	Adam-Stokes Attacks
901	Varicocele
902	Pancreatic Diseases
903	Tonic-Clonic Convulsion Disorder
904	Neuroectodermal Tumor, Primitive
905	Periapical Cyst
906	Neoplasms, Otorhinolaryngologic
907	Stye
908	Neurotheceoma
909	Ethyl Alcohol Abuse Neurologic Syndromes
910	Infection, Central Nervous System, Protozoal
911	Critically Ill
912	Malignant Hypertension
913	Inflammatory Encephalomyelitis
914	Ventricular Dysfunction
915	Hydronephrosis
916	Tonsillitis
917	Peliosis Hepatis
918	Aortic Diseases
919	Acute-Phase State
920	Morbid Obesity
921	Deficiency, Vitamin D
922	Cellulitis
923	Little's Disease
924	Neoplasms, Skull
925	Gliosis
926	Leukostasis Syndrome
927	Infections, Mycobacterium ulcerans
928	Lymphocytosis
929	Cryoglobulinemia
930	IHSS
931	Aortic Stenosis
932	Agricultural Worker Disease
933	GH-Secreting Pituitary Adenoma
934	Epilepsy, Localization-Related
935	Cyclitis, Chronic
936	Heme Synthetase Deficiency
937	Scarring
938	Meningiomatosis
939	Bile Reflux
940	Nasal Catarrh
941	Anterior Cerebral Artery Aneurysm
942	Extranodal NK-T-Cell Lymphoma, Nasal Type
943	Bronchopulmonary Aspergilloses
944	Tuberculosis, Osteoarticular
945	Adrenal Gland Diseases
946	Pyoderma Gangrenosum
947	Enteritis
948	Amenorrhea
949	Trench Fever
950	Congenital Erythropoietic Porphyria
951	Sclerosing Hemangioma, Lung
952	Leukoencephalopathy
953	Abortion Failure
954	Dermoid
955	Corneal Diseases
956	Teeth, Devitalized
957	Tic Disorders, Childhood
958	Gastric Diseases
959	Eventration of Diaphragm
960	Blepharospasm-Oromandibular Dyskinesia
961	Lymphocoele
962	Neoplasm, Rathke Cleft
963	Diabetic Vascular Complications
964	Mandibular Neoplasms
965	Excessive Periodic Sleep-Related Leg Movements
966	Strongyloidiasis
967	Acne Keloidalis
968	Usher Syndrome, Type 3
969	Viral Meningitis
970	Polychondritis, Chronic Atrophic
971	Aberrant Tissue
972	Lupus Erythematosus Panniculitis
973	Cerebral, Left Hemisphere, Infarction
974	Yolk Sac Tumor
975	Sinoatrial Exit Block
976	Brock's Syndrome
977	Slow-Flow Phenomenon
978	Cerebroventricular Neoplasms
979	Surgical Hemorrhage
980	Allergic Cutaneous Vasculitis
981	Myositis Ossificans
982	Tachycardia
983	Ewing's Tumor
984	Hemothorax
985	Cystadenocarcinoma, Mucinous
986	Diabetic Feet
987	Renal Medullary Necrosis
988	Eulenburg Disease
989	Hypercalciuria
990	Hand Dermatosis
991	Solitary Fibrous Tumors
992	Iritis
993	Synovioma
994	Acute Necrotizing Encephalitis, Herpetic
995	Neoplasms, Meningeal
996	Mixed Tumor, Mesodermal
997	Hypertrophic Pyloric Stenosis
998	Localized Mesothelioma
999	Submandibular Gland Diseases
1000	Enophthalmos
1001	Gastrointestinal Stromal Neoplasms
1002	alpha-Chain Disease
1003	Complications of Diabetes Mellitus
1004	Maxillary Diseases
1005	Pancreatic Cyst
1006	Dehiscence, Surgical Wound
1007	Inflammatory Pseudotumor, Pulmonary
1008	Female Genital Neoplasms
1009	Sclerosis, Disseminated
1010	Black Water Fever
1011	Atrophic Muscular Disorders
1012	Syphilis, Latent
1013	Angiokeratoma
1014	Time Zone Syndrome
1015	Paraganglioma, Gangliocytic
1016	Dermatitis Medicamentosa
1017	Lymphangiomyomatosis
1018	Enterocolitis
1019	Left Ventricular Outflow Obstruction
1020	Brain Vascular Disorders
1021	Catscratch Disease
1022	Intertrigo
1023	Mast-Cell Leukemia
1024	Vasculitis, Retinal
1025	Unknown Primary Neoplasms
1026	Neurofibroma
1027	Esophagitis, Reflux
1028	REM Sleep Deprivation
1029	Kikuchi-Fujimoto Disease
1030	Mast-Cell Disease
1031	Hemorrhagic Thrombocythemia
1032	Cerebrovascular Accident, Acute
1033	Abscess, Subphrenic
1034	Gaucher's Disease
1035	Hashimoto's Syndrome
1036	Inflammation, Perinephrium
1037	Torsade de Pointes
1038	Gangliocytoma
1039	Esophageal Diverticulosis
1040	Angiitis
1041	Tonsillar Hernia
1042	Endothelioma, Lymphatic
1043	Arterial Diseases, Cerebral
1044	Neoplasms, Pancreatic
1045	Arterial Diseases, Carotid
1046	Central Nervous System Infection
1047	Cerebellar Disorders
1048	Pericardial Tamponade
1049	Neoplasms, Intestinal
1050	Postinfectious Arthritis
1051	Alveolar Echinococcis, Hepatic
1052	Neoplasms, Adrenal Gland
1053	Cholangitis
1054	Myositis, Multiple
1055	Necrotizing Sialometaplasia
1056	L-Tryptophan-Related Eosinophilia-Myalgia Syndrome
1057	Pleural Diseases
1058	Osteosclerosis
1059	Panniculitis
1060	Neoplasms, Cerebellar
1061	Pituitary Tumors
1062	Pseudoxanthoma Elasticum, Forme Fruste
1063	Embolism
1064	Metabolic Bone Diseases
1065	Infections, Stephanurus dentatus
1066	Achalasia
1067	Thyroiditis
1068	Food Allergy
1069	Developmental Bone Disease
1070	Complications, Neoplastic Pregnancy
1071	Decalcification, Pathological
1072	Juvenile Myelomonocytic Leukemia
1073	ANCA-Associated Vasculitides
1074	Nasal Bleeding
1075	Wegener's Granulomatosis
1076	Respiratory Tract Fistula
1077	Thrombophlebitis
1078	Achondroplasia
1079	Moya-Moya Disease
1080	Fallen Urinary Bladder
1081	Nycturia
1082	Fecal Incontinence
1083	Neoplasms, Bone Marrow
1084	Crisis, Thyrotoxic
1085	Brain Disorders
1086	CADASIL
1087	Monoclonal Gammapathies, Benign
1088	Marfan's Syndrome
1089	Cysts, Hydatid
1090	Acute Relapsing Multiple Sclerosis
1091	Orchitis
1092	Sleep Walking
1093	Fibroma, Ossifying
1094	Rhabdoid Tumor
1095	Gonadal Dysgenesis, 46,XX
1096	Hives
1097	Primary Hyperparathyroidism
1098	Vogt-Koyanagi-Harada Disease
1099	Bacterial Aneurysm
1100	Signet Ring Cell Carcinoma
1101	Jaw, Edentulous, Partially
1102	Lyme Borreliosis
1103	Serum Sickness
1104	Desmoid
1105	Catastrophic Illness
1106	Neoplasms, Nervous Tissue
1107	Tick Toxicoses
1108	Eye Motility Disorders
1109	Hemostatic Disorders, Vascular
1110	Brain Abscess
1111	Foreign-Body Reaction
1112	Neoplasms, Paranasal Sinus
1113	Gastritis
1114	Hydradenitis
1115	Crohn's Disease
1116	Rheumatoid Nodule
1117	Chorangioma
1118	Dentigerous Cyst
1119	Pleuropneumonia
1120	Drug-Food Interactions
1121	Gastric Ulcer
1122	Pancytopenia
1123	Adenosis of Breast
1124	Dental Focal Infections
1125	Diabetes Mellitus, Lipoatrophic
1126	Infections, Fungal, Central Nervous System
1127	Diastematomyelia
1128	Arterial Hyperemia
1129	Syndrome, Upper Airway Resistance, Sleep Apnea
1130	Neoplasms, Choroid Plexus
1131	Embolism, Pulmonary
1132	Primary Progressive Multiple Sclerosis
1133	Soft Tissue Neoplasms
1134	Neurofibromatosis, Peripheral, NF 1
1135	Patent Oval Foramen
1136	Abrasion, Dental
1137	Neoplasms, Sigmoid
1138	Atrophy of Gingiva
1139	Bladder, Overactive
1140	Cold, Common
1141	Deficiency, Factor XII
1142	Tachycardia, Paroxysmal
1143	Nail Diseases
1144	Diseases of Nasopharynx
1145	Premature Ventricular Complex
1146	Helminthiasis, Central Nervous System
1147	Tryptophan Metabolism Alterations
1148	Hypermelanosis
1149	Neoplasms, Biliary Tract
1150	Primary Hyperoxaluria
1151	Charcot-Marie Disease
1152	Paradoxical Embolism
1153	Nonne-Milroy-Meige Disease
1154	Telangiectasia
1155	Meningitis
1156	Regurgitation, Aortic Valve
1157	Plasma Cell Myeloma
1158	Plasma Cell Neoplasms
1159	Thost-Unna Syndrome
1160	Enteropathy, AIDS-Associated
1161	Drug Allergy
1162	Suppuration
1163	Mastoiditis
1164	Infections, Clostridium
1165	Liver Insufficiency
1166	Dancing Eyes-Dancing Feet Syndrome
1167	Acute Disease
1168	Jaw, Edentulous
1169	Benign Essential Tremor
1170	Hemorrhage, Gastrointestinal
1171	Retinal Artery Occlusion
1172	Disease Progression
1173	Pathologic Bone Demineralization
1174	Hypomagnesemia-Hypokalemia, Primary Renotubular, with Hypocalciuria
1175	Chondroma
1176	Siderosis
1177	Infertility, Female
1178	Cystic Kidney Diseases
1179	Deficiency, Factor VIII
1180	Myopia, Pathological
1181	Myocarditis
1182	Thoracic Neoplasms
1183	Acidosis, Diabetic
1184	Malignant Carcinoid Syndrome
1185	Granular Cell Myoblastoma
1186	Self Induced Illness
1187	Carcinoma, Neuroendocrine
1188	Histiocytosis-X
1189	Anti-Phospholipid Syndrome
1190	Oral Submucous Fibrosis
1191	Ratbite Fever
1192	Stomatitis, Denture
1193	Infections, Yersinia
1194	Hypophosphatemia
1195	Chronic Post-Concussive Encephalopathy
1196	Dystonia Deformans Progressiva
1197	Infections, Togavirus
1198	Pancreatic Fistula
1199	Proctitis
1200	Eczema, Dyshydrotic
1201	Sao Paulo Typhus
1202	Embolism and Thrombosis, Brain
1203	Optic Neuropathy, Anterior Ischemic
1204	Castleman's Disease
1205	Histiocytosis
1206	Gangrene
1207	Male Impotence
1208	Mediastinal Diseases
1209	Deficiency, Factor V
1210	Infections, Helicobacter
1211	Biliary Fistula
1212	Ganglioneuroblastoma
1213	Uterine Prolapse
1214	Bacterial Meningitides
1215	Sweat Gland Diseases
1216	Cholesteryl Ester Storage Disease
1217	Renal Failure
1218	Facial Palsy
1219	HTLV I Associated Myelopathies
1220	Granuloma, Eosinophilic
1221	Visceral Larva Migrans Syndrome
1222	Hematocele
1223	Adult Spinal Muscular Atrophy
1224	Typhus, Murine
1225	Ankylosis, Dentoalveolar
1226	Acute Febrile Neutrophilic Dermatosis
1227	Pituitary Disorders
1228	Thrombocythemia
1229	Connective Tissue Diseases
1230	Ventilatory Depression
1231	Low T3 High T4 Syndrome
1232	Chicken Pox
1233	Systemic Scleroderma
1234	Uveitis, Anterior
1235	Toxemia
1236	Kidney Insufficiency
1237	Mediastinum Inflammation
1238	Struma Ovarii
1239	Hypoventilation
1240	Thrombosis, Common Carotid Artery
1241	Lambliasis
1242	Cardiovascular Diseases
1243	Infections, Yersinia pseudotuberculosis
1244	Neoplasms, Uterine
1245	Neoplasms, Supratentorial
1246	Xanthomatosis
1247	Gelatinous Ascites
1248	Fascioliasis
1249	Adenoma, Basophilic
1250	Tongue, Furrowed
1251	Muscular Dystrophy, Oculopharyngeal
1252	Pseudomembranous Enteritis
1253	Primary Myocardial Diseases
1254	Hemorrhage, Cerebrum
1255	Neoplasms, Splenic
1256	Choroidal Hemorrhage
1257	Scorbutus
1258	Methemoglobinemia
1259	Nervous System Tumors
1260	Sinus Node Reentrant Tachycardia
1261	Leprosy, Dimorphous
1262	Leprosy, Nodular
1263	Fragilitas Ossium
1264	Cancer of Granulosa Cells
1265	Aortic Subvalvular Stenosis
1266	Ganglioglioma
1267	Sleep-Wake Disorder, Non-24 Hour
1268	AIDS Wasting Syndrome
1269	Infections, Soft Tissue
1270	Thrombosis
1271	Myofibroma
1272	Infections, Parvoviridae
1273	Infections, Prosthesis-Related
1274	Hypercalcemia
1275	Bowel Diseases, Inflammatory
1276	Pyuria
1277	Lupus Erythematosus Disseminatus
1278	Small Cell Lung Cancer
1279	Cerebrospinal Rhinorrhea
1280	Abortion, Missed
1281	Burkitt's Lymphoma
1282	Melanoma, Malignant, of Soft Parts
1283	Hereditary Blood Coagulation Disorders
1284	Omphalocele
1285	Hemangiopericytoma
1286	CD4+ T-Lymphocytopenia
1287	Middle Ear Inflammation
1288	Maculopapular Cutaneous Mastocytosis
1289	Gastroenteritis
1290	Clinically Isolated CNS Demyelinating Syndrome
1291	Disease
1292	Gingival Hypertrophy
1293	Acute Kidney Insufficiency
1294	Amoebiasis, Intestinal
1295	Fibrosis
1296	Sparganosis
1297	Infections, Hantavirus
1298	Malta Fever
1299	Encephalitis, Postvaccinal
1300	Schaumann Disease
1301	Eye Diseases
1302	Infectious Thyroiditis
1303	Isosporiasis
1304	Weber-Christian Disease
1305	Icterus
1306	Tooth Eruption, Ectopic
1307	Fong Disease
1308	Hereditary Ventricular Hypertrophy
1309	Leiomyosarcoma
1310	BOOP
1311	Deficiency, Vitamin B 12
1312	Endometritis
1313	Rhabdomyosarcoma, Embryonal
1314	Romberg's Disease
1315	Dermatitis, Primary Irritant
1316	Cystadenoma
1317	BCECTS
1318	Seizures, Vestibular
1319	Infections, Ascaridida
1320	Ear Inflammation
1321	Adenoma, Acidophilic
1322	Infections, Bacteroides
1323	Monkey Pox
1324	Comatose
1325	Abscess, Peritonsillar
1326	Diabetes, Phosphate
1327	Fibromyxoma
1328	Hearing Loss, Bilateral
1329	Intracranial Arteriosclerosis
1330	Cardiac Neoplasms
1331	Diphyllobothriasis
1332	Neoplasms, Pleural
1333	Drusen, Optic Disc
1334	Photoallergic Contact Dermatitis
1335	Central Core Disease
1336	Dermatitis
1337	Head, Neck Neoplasms
1338	Valvular Heart Diseases
1339	Epilepsy, Psychic Equivalent
1340	Urinary Stress Incontinence
1341	Car Sickness
1342	Sjogren's Syndrome
1343	Carcinoid
1344	Bed Sores
1345	Neoplasms, Prostatic
1346	Urethral Diseases
1347	Blood Pressure, High
1348	Intravascular Agglutination
1349	Seminoma
1350	Encephalomeningitis
1351	Well-Differentiated Oligodendroglioma
1352	Ancylostomiasis
1353	Osteoradionecrosis
1354	Autosomal Dominant Optic Atrophy
1355	Cholecystoduodenal Fistula
1356	Sarcoma, Osteogenic
1357	Neonatal Substance Withdrawal
1358	Tuberculous Pericarditis
1359	Encephalitis, Limbic
1360	Ventricular Fibrillation
1361	Deficiency, Thiamine
1362	Nails, Malformed
1363	Chiari's Syndrome
1364	Basal Ganglia Vascular Disease
1365	Paralysis, General
1366	Amyloidosis
1367	Scotoma
1368	Vestibular Diseases
1369	Blindness
1370	Lactation Disorders
1371	Penis Diseases
1372	Infections, Borrelia
1373	Malabsorption Syndromes
1374	Hydrocephaly
1375	Deficiency Disease, alpha-Fucosidase
1376	Large-Cell Immunoblastic Lymphoma
1377	Herpes Simplex
1378	Dumping Syndrome
1379	Infections, Rickettsiaceae
1380	Hypercoagulability
1381	Deficiency, Factor IX
1382	Deficiency, Magnesium
1383	Deficiency, Protein S
1384	Addison's Disease
1385	Acantholysis Bullosa
1386	Dental Prosthesis Failures
1387	Parotid Diseases
1388	Autoimmune Diseases, Nervous System
1389	Proptosis
1390	Right-Sided Heart Failure
1391	Poland Syndrome
1392	Liposarcoma, Myxoid
1393	Infection, Surgical Wound
1394	Liposarcoma
1395	Wheat Allergy
1396	Hyperlipidemia
1397	Acoustic Nerve Disorders
1398	Pleural Effusion
1399	Myoma
1400	Heart Block
1401	Angle Class II
1402	Abnormalities, Nervous System
1403	Scleroderma, Circumscribed
1404	Angiomyxoma
1405	Neurally Mediated Faint
1406	Teratoma, Immature
1407	Bladder, Neurogenic
1408	Abortion, Threatened
1409	Kawasaki Syndrome
1410	Krukenberg's Tumor
1411	Infections, Serratia
1412	Chondrosarcoma
1413	Circulatory Collapse
1414	Cardiac Death
1415	Cheilitis Granulomatosa
1416	Collagenous Colitis
1417	Sialitis
1418	Cerebral Angiospasm
1419	Tuberculosis, Splenic
1420	Autonomic Dysfunction, Paraneoplastic
1421	Paraneoplastic Syndromes
1422	Infections, Taenia
1423	Luft's Disease
1424	Neoplasms, Brain
1425	Mononucleosis, Infectious
1426	Early Post-Traumatic Seizures
1427	Mesothelioma
1428	Leiomyoblastoma
1429	Arterial Brain Diseases
1430	Priapism
1431	Arteriosclerosis
1432	Interstitial Nephritis
1433	Thromboembolism
1434	Moschcowitz Disease
1435	Gastroduodenal Ulcer
1436	Adenocarcinoma, Clear Cell
1437	Cancer of Duodenum
1438	Paragonimiasis
1439	Cementoma
1440	Attachment Loss, Periodontal
1441	Primary Central Nervous System Neoplasms
1442	Hyper prebeta lipoproteinemia
1443	Compression Atelectasis
1444	Amentia
1445	Neoplasms, Parathyroid
1446	Infections, Chlamydia
1447	Keratitis, Ulcerative
1448	Mucormycosis
1449	Gluten-Sensitive Enteropathy
1450	Osler-Rendu-Weber Disease
1451	Prematurity
1452	Pouch Ileitis
1453	Neoplasms, Ureteral
1454	MCTD
1455	Cyst, Pulmonary Hydatid
1456	Hyperphosphatemia
1457	Pericardial Effusion
1458	Jaundice, Cholestatic
1459	Anuria
1460	Infections, Staphylococcal
1461	Recklinghausen Disease of Bone
1462	Neoplasms, Urologic
1463	Blood Protein Disorders
1464	Alopecia, Male Pattern
1465	Oligomenorrhea
1466	Neurofibromatosis, Central, NF 2
1467	Diastolic Heart Failure
1468	Epidermolysis Bullosa Dystrophica, Dominant
1469	Tuberculoma
1470	Cardiac Free Wall Rupture
1471	Childhood Muscular Dystrophy, Pseudohypertrophic
1472	Endocarditis, Loeffler's
1473	ACTH-Producing Pituitary Adenoma
1474	Cystoliths
1475	Lymphadenitis
1476	Cardiovascular Pregnancy Complications
1477	Mixed Central and Obstructive Sleep Apnea
1478	Verruca
1479	Parasitic Intestinal Diseases
1480	Cochlear Diseases
1481	Gingival Hyperplasia
1482	Paraganglioma, Non-Chromaffin
1483	Endomyocardial Fibrosis
1484	Placental Abruption
1485	Osler-Vaquez Disease
1486	Beriberi
1487	Neoplasms, Ovarian
1488	Hypersplenism
1489	Otitis Media, Purulent
1490	Vincent's Infection
1491	Hypophosphatemia, X-Linked
1492	Pelger-Huet Anomaly
1493	Neoplasms, Oropharyngeal
1494	Necrosis
1495	Sheehan's Syndrome
1496	Plasmocytoma
1497	Neutrophilic Leukemia, Chronic
1498	Periocular Dermatitis
1499	Cyclosporiasis
1500	Carcinoma, Adenosquamous
1501	Cysticercosis
1502	Feline Diseases
1503	Pseudocyesis
1504	Angiosarcoma
1505	Metastases, Neoplasm
1506	Loaiasis
1507	Oesophagostomiasis
1508	Preexcitation Syndrome
1509	Alexander's Disease
1510	Lymphoma, AIDS-Associated
1511	Multiple Neurofibromas
1512	Pleural Effusion, Malignant
1513	Otorrhea, Cerebrospinal Fluid, Spontaneous
1514	Neoplasms, Parotid
1515	Asystole
1516	Ranula
1517	Nodular Hidradrenoma
1518	Degenerative Hereditary Diseases, Nervous System
1519	Radiation Syndrome
1520	Erythema Chronicum Migrans
1521	Neoplasms, Kidney
1522	Lymphoblastic Leukemia, Acute, L1
1523	Infections, Spirurida
1524	Pulmonary Sarcoidosis
1525	Precursor T-Cell Lymphoblastic Leukemia
1526	Parkinson's Disease
1527	Deficiency, Protein C
1528	Bourneville's Disease
1529	Epulis
1530	Cytochrome Oxidase Deficiency
1531	Dystocia
1532	Central Hearing Loss
1533	Leg Dermatosis
1534	Deficiency, Platelet Storage Pool
1535	Inappropriate Prolactin Secretion
1536	Extremely Low Birth Weight Infant
1537	Anterior Circulation Transient Ischemic Attack
1538	Neoplasms, Ear
1539	Pleurisy, Tuberculous
1540	Hemorrhagic Fever, Epidemic
1541	Low Cardiac Output Syndrome
1542	Nasopharyngitis
1543	Constrictive Pericarditis
1544	Subsepsis Allergica
1545	Diffuse Large-Cell Lymphoma
1546	Periodontitis
1547	Epulides, Giant Cell
1548	Smell Disorders
1549	Keratoconjunctivitis Sicca
1550	Erysipelas
1551	Thyroid Nodule
1552	Respiratory Alkalosis
1553	Neuroendocrine Tumors
1554	Parodontosis
1555	Myxosarcoma
1556	Zygomycosis
1557	Bile Duct Obstruction
1558	Salivary Duct Stones
1559	Papilloma, Inverted
1560	Seizures, Epileptic
1561	Hyperparathyroidism
1562	Neoplasms, Gallbladder
1563	Myxedema
1564	Hypocalcemia
1565	Encephalopathy, Arsenic
1566	Parotiditis
1567	Neoplasms, Mediastinal
1568	Renal Artery Obstruction
1569	Conjunctivitis
1570	Adenoma, Hepatocellular
1571	Hamartoma
1572	Long QT Syndrome
1573	Tooth Erosion
1574	APC Resistance
1575	Angle Class III
1576	Diabetes, Bronze
1577	Neoplasms, Gastrointestinal
1578	Malakoplakia
1579	Retained Placenta
1580	Thrombopenia
1581	Hemorrhagic Proctocolitis
1582	Astroglioma
1583	Angiodysplasia
1584	Gilchrist Disease
1585	Tuberculosis, Hepatic
1586	Amyloid Angiopathy, Cerebral
1587	Facial Dermatosis
1588	Blue Nevi
1589	Schistosomiasis haematobium
1590	Polycystic Renal Disease
1591	Ulcerative Colitis
1592	Adie's Syndrome
1593	Cholesteatoma
1594	Hyperlipoproteinemia
1595	Acute Retinal Necrosis
1596	Kojewnikow's Syndrome
1597	Hypoadrenalism
1598	Infections, Burkholderia
1599	Carcinoma, Bronchial
1600	Rhabdomyosarcoma, Alveolar
1601	Nearsightedness
1602	Congenital Hyperostosis, Cortical
1603	Joseph Azorean Disease
1604	Histiocytosis, Non-Langerhans-Cell
1605	Ulcerogenic Islet Cell Tumor
1606	Diseases in Twins
1607	Entamoebiasis
1608	Venous Leakage, Penile
1609	Canine Diseases
1610	Blastomas, Pulmonary
1611	Endometrioid Adenocarcinoma
1612	Endarteritis
1613	Bullous Dermatoses
1614	Edema, Pulmonary
1615	Ehrlichiosis
1616	Hypokalemic Periodic Paralysis, Familial
1617	Germinoma
1618	Hemangio-Endothelioma
1619	Biliary Stasis, Extrahepatic
1620	Ventricular Tachycardia
1621	Salivary Gland Diseases
1622	Eclampsia
1623	Meniere's Syndrome
1624	Pupillary Disorders
1625	Tuberculosis, Female Genital
1626	Apraxia, Motor
1627	Oxyuriasis
1628	Diabetic Coma
1629	Leukorrhea
1630	Acquired Gerstmann's Syndrome
1631	Hereditary Type IV Motor and Sensory Neuropathy
1632	Moniliasis, Cutaneous
1633	Neurologic Voice Disorder
1634	Hansen Disease
1635	Sarcomatous Glioma
1636	Urinary Incontinence
1637	Catheter-Related Infections
1638	Sertoli Cell Tumor
1639	Surgical Shock
1640	Orbital Neoplasms
1641	Sarcoma, Cerebellar, Circumscribed Arachnoidal
1642	Lactic Acidosis
1643	Necrotizing Pyelonephritis
1644	Query Fever
1645	Paroxysmal Hemoglobinuria, Cold
1646	Dupuytren's Disease
1647	Nephroid Carcinoma
1648	Cervicitis
1649	Infections, Nocardia
1650	Meningitis, Streptococcus pneumoniae
1651	Carcinoma, Papillary, Follicular
1652	Chagas' Cardiomyopathy
1653	Lupus Erythematosus, Cutaneous, Subacute
1654	Neoplasms, Digestive System
1655	Fanconi Renotubular Syndrome
1656	Choroidal Diseases
1657	Scleredema Adultorum
1658	Dermatitis Exfoliativa
1659	Aspiration, Respiratory
1660	Hypercholesteremia
1661	Atherosclerosis
1662	Maxillary Neoplasms
1663	Acne
1664	Infantile Papular Acrodermatitis
1665	Hepatic Veno Occlusive Disease
1666	Pulmonary Veno Occlusive Disease
1667	Cyclitis, Heterochromic
1668	Osteodystrophy, Renal
1669	Toxic Epidermal Necrolysis
1670	Balanitis
1671	Echo Virus Infections
1672	Insulin Coma
1673	Squamous Cell Neoplasms
1674	Left Ventricular Hypertrophy
1675	Monoclonal Gammapathies
1676	Audiogenic Epilepsy
1677	Disorders, Congenital
1678	B-Cell Lymphoma
1679	Extracranial Primitive Neuroectodermal Tumor
1680	Infections, Streptococcal
1681	Adenoma
1682	Hormone-Dependent Neoplasms
1683	Central Nervous System Toxoplasmosis
1684	Superior Vena Cava Obstruction
1685	Deficiency, Factor X
1686	Foot Rot
1687	Dermatopolymyositis
1688	Lymphoma, T Cell, Peripheral
1689	Hypophosphatasia
1690	Apolipoprotein B-100, Familial Ligand-Defective
1691	Edema, Laryngeal
1692	Atrioventricular Conduction Block
1693	Infections, Herpesvirus
1694	Acute Kidney Failure
1695	Hyperkeratosis Palmaris et Plantaris
1696	Tsutsugamushi Fever
1697	Addison's Anemia
1698	Plasmacytic Leukemia
1699	Endolymphatic Hydrops
1700	Neoplasms, Jaw
1701	Lymphatic Diseases
1702	Oxaluria
1703	Hepatitis
1704	Anal Fistula
1705	Carcinoma, Ductal, Pancreatic
1706	Delayed Graft Function
1707	Granulomas
1708	Cylindroma
1709	Postgastrectomy Syndromes
1710	Arthritis, Acute Rheumatic
1711	Carcinoma, Large Cell
1712	Epilepsy, Benign Neonatal, Non-Familial
1713	Drug-Induced Liver Disease
1714	Giant Cell Tumors
1715	Zollinger-Ellison Syndrome
1716	Atrophy
1717	Cerebral Edema, Cytotoxic
1718	Devic's Disease
1719	Glomus Jugulare Tumor
1720	Dentin Dysplasia
1721	Angiofibroma
1722	Hermansky-Pudlak Syndrome
1723	Neurodermatitis, Circumscribed
1724	Apnea
1725	Lacrimal Apparatus Diseases
1726	Benign Neonatal Sleep Myoclonus
1727	Adenocarcinoma, Granular Cell
1728	Common Bile Duct Neoplasms
1729	Angioimmunoblastic Lymphadenopathy
1730	Carcinoma, Colloid
1731	Werlhof Disease
1732	Dactylolysis Spontanea
1733	Focal Infection
1734	Meningitis, Meningococcic
1735	Pseudo-Pseudohypoparathyroidism
1736	Egg Allergy
1737	Pituitary Gigantism
1738	Dermatosis
1739	Toxic Megacolon
1740	Urogenital Tuberculosis
1741	Hypothyroidism
1742	Leukemia, Myeloid, Schilling Type
1743	White Spot, Dental
1744	Herpes Simplex Virus Genital Infection
1745	Infections, Meningococcal
1746	Myotonia Atrophica
1747	Bowen Disease
1748	Motor Neuron Disease, Familial
1749	Megacolon
1750	Exercise-Induced Asthma
1751	Hypertension, Ocular
1752	Emphysema
1753	Infection, Wound
1754	Wolf-Parkinson-White Syndrome
1755	High-Density Lipoprotein Deficiency, Tangier Type
1756	Precursor B-Cell Lymphoblastic Leukemia
1757	Weil's Disease
1758	Multiple System Atrophy Syndrome
1759	Encephalopathy, Kuru
1760	Anemia, Cooley's
1761	Connective Tissue Neoplasms
1762	Hypothalamic Diseases
1763	Hashish Abuse
1764	Alopecia Mucinosa
1765	Lethal Catatonia
1766	Larynx Diseases
1767	End-Stage Kidney Disease
1768	Necrotizing Enterocolitis
1769	Hemorrhage, Peptic Ulcer
1770	Jaw Cysts
1771	Cholangiitis, Sclerosing
1772	Keratoderma Blennorrhagicum
1773	Gingival Overgrowth
1774	Infections, Bacteroidaceae
1775	Thomsen's Disease
1776	Ductal Carcinoma
1777	Lymphadenitis, Tuberculous
1778	Glioma, Optic Nerve, Adult
1779	Schistosomiasis mansoni
1780	Leukemia, Megakaryocytic
1781	Herpes Simplex, Oral
1782	Diseases, Metabolic
1783	Rhinitis, Allergic, Nonseasonal
1784	Tumour Lysis Syndrome
1785	Phorias
1786	Sclerosis
1787	Persistent Truncus Arteriosus
1788	Multicystic Kidney Dysplasia
1789	Unilateral Hearing Loss
1790	Neoplasms, Breast
1791	Vascular Tissue Neoplasms
1792	Failure to Thrive
1793	Bacterial Skin Diseases
1794	Hyponatremia
1795	Hepatic Failure, Acute
1796	Familial Amyloid Neuropathy, Finnish Type
1797	Auricular Flutter
1798	Mitral Insufficiency
1799	Developmental Coordination Disorder
1800	Tuberculosis, Endocrine
1801	Vaginitis
1802	Neoplasms, Anus
1803	Infection, Mycobacterium avium-intracellulare
1804	Nystagmus, Pathologic
1805	Tapeworm Infection
1806	Empyema
1807	Neoplasms, Lung
1808	St. Louis Encephalitis
1809	Infections, Salmonella
1810	Cardiomyopathy, Dilated, CMD1A
1811	Leptospirosis
1812	Seeding, Neoplasm
1813	Granuloma Annulare
1814	Genital Warts
1815	Anti-Yo-Associated Paraneoplastic Cerebellar Degeneration
1816	Amyloidosis - hereditary
1817	Intestinal Polyposis
1818	Respiratory Tract Diseases
1819	Lentiginosis
1820	Mixed Salivary Gland Tumor
1821	Eosinophilias, Pulmonary
1822	Vitamin Deficiency
1823	Parakeratosis
1824	Toxocariasis
1825	Neoplasms, Genitourinary
1826	Antithrombin 3 Deficiency
1827	Lymphoma of Mucosa-Associated Lymphoid Tissue
1828	Infections, Pasteurella
1829	Otitis Interna
1830	Bartter Disease
1831	Infections, Ureaplasma
1832	Alcoholic Cardiomyopathy
1833	Dysplastic Gangliocytoma of Cerebellum
1834	Oligohydramnios
1835	Cholangioma
1836	Madelung Neck
1837	Mixed Tumor, Mullerian
1838	Tachycardia, Supraventricular
1839	Cervix Diseases
1840	Iron Overload
1841	Granulomatosis, Lymphomatoid
1842	Neoplasms, Rectal
1843	Lymphangitis
1844	Neutropenia
1845	Hyperthyroidism
1846	Benign Psychomotor Epilepsy, Childhood
1847	Optic Atrophy
1848	Parapsoriasis
1849	Carcinoma, Skin Appendage
1850	Right Ventricular Dysfunction
1851	Secondary Hyperparathyroidism
1852	Parasitic Skin Diseases
1853	Neoplasms, Optic Nerve
1854	Gonadal Dysgenesis
1855	Mesoblastic Nephroma
1856	Brugada Syndrome
1857	Carcinoma, Non-Small Cell Lung
1858	Allergy
1859	Hyperinsulinemia
1860	Diseases of Endocrine System
1861	Water Intoxication
1862	Infections, Roseolovirus
1863	Tuberculosis, Renal
1864	Epithelial Tumors, Malignant
1865	Neoplasms, Hypothalamic
1866	Shock, Anaphylactic
1867	Measles, German
1868	Hyporeninemic Hypoaldosteronism
1869	Tauopathy
1870	Tooth Resorption
1871	Incontinentia Pigmenti Achromians
1872	Bouillaud's Disease
1873	Deficiency, Factor XIII
1874	Carotid Artery Stenosis
1875	Thrombasthenia of Glanzmann and Naegeli
1876	Hayfever
1877	Gilbert's Disease
1878	Seborrheic Keratosis
1879	Trichocephaliasis
1880	Gingivitis
1881	Swamp Fever
1882	Goltz's Syndrome
1883	Inclusion Body Myositis, Sporadic
1884	Molluscum Contagiosum
1885	Coagulation Disorders, Blood
1886	Myelofibrosis
1887	Otitis Media, Secretory
1888	Bacteremia
1889	Carcinoma, Giant Cell
1890	Fetal Presentation, Breech
1891	Root Resorption
1892	Local Neoplasm Recurrence
1893	Liver Diseases
1894	Corneal Edema
1895	Neoplasms, Bile Duct
1896	Bronchospasm
1897	Hemorrhage, Postpartum
1898	Melasma
1899	Xerophthalmia
1900	Shock, Traumatic
1901	Inflammatory Response Syndrome, Systemic
1902	Dehydration
1903	Farsightedness
1904	Gasser Syndrome
1905	Shipping Fever
1906	Lymphoma, Non-Hodgkin's
1907	Chromosome 6-Linked Autosomal Recessive Parkinsonism
1908	Water-Electrolyte Imbalance
1909	Alveolar Soft Part Sarcoma
1910	Disgerminoma
1911	Phototoxic Contact Dermatitis
1912	Embryonal Neoplasms
1913	Scalp Dermatosis
1914	Sex Cord-Stromal Tumor
1915	Rectovaginal Fistula
1916	Infections, Campylobacter
1917	Pellagra
1918	Bacterial Endocarditides
1919	Fibroadenoma
1920	Chorea Disorders
1921	Myofibromatosis
1922	Conductive Hearing Loss
1923	Basal Ganglia Disorders
1924	Sertoli-Leydig Cell Tumors
1925	Mastitis
1926	Anemias, Iron-Deficiency
1927	Convulsive Seizure Disorder, Generalized
1928	Presbyopia
1929	Very-Low-Birth-Weight Infant
1930	Blepharitis
1931	Hepatic Failure
1932	Bile Duct Obstruction, Intrahepatic
1933	Acid-Base Imbalance
1934	Neoplasms, Colonic
1935	Deficiency, Factor XI
1936	Pompe's Disease
1937	Neoplasms, Nasopharyngeal
1938	Waldenstrom's Macroglobulinemia
1939	Uveal Diseases
1940	Neurologic Degenerative Conditions
1941	Palmoplantaris Pustulosis
1942	Atrial Premature Complex
1943	Tuberculosis, Miliary
1944	Eyelid Diseases
1945	Coccidioidomycosis
1946	Ota's Nevus
1947	Neoplasms, Gingival
1948	Infectious Skin Diseases
1949	Obesity
1950	Facial Neoplasms
1951	Brain Inflammation
1952	Infections, Cardiovirus
1953	Auricular Fibrillation
1954	Protein-Losing Enteropathy
1955	Infections, Gram-Positive Bacterial
1956	Neoplasms, Testicular
1957	Rhinitis, Atrophic
1958	Ophthalmopathies, Thyroid-Associated
1959	Cholangiocellular Carcinoma
1960	Crush Syndrome
1961	Creeping Eruption
1962	Photodermatitis
1963	Complications, Hematologic Pregnancy
1964	Friedreich's Ataxia
1965	Ophthalmia
1966	Septic Abortion
1967	HMSN Type V
1968	Asthmatic Crisis
1969	Hypoparathyroidism
1970	Hypertrichosis
1971	Diabetes Mellitus, Non Insulin Dependent
1972	Rett's Syndrome
1973	Erythema Multiforme
1974	Porphyria Cutanea Tarda
1975	Flavobacteriaceae Infections
1976	Sclera Diseases
1977	Oculoauriculovertebral Syndrome
1978	Angioma, Sclerosing
1979	Hemorrhage, Retinal
1980	Granuloma, Pseudopyogenic
1981	Gehrig's Disease
1982	Cystadenocarcinoma
1983	Pneumonia, Pneumococcal
1984	Laryngitis
1985	Leukocytopenia
1986	Eczema, Atopic
1987	Hematologic Malignancy
1988	Extramembranous Glomerulopathy
1989	Deficiency, IgA
1990	Medication-Induced Dyskinesia
1991	Nelson Syndrome
1992	Hyperglycemia
1993	Autoimmune Thyroiditis
1994	Deficiency, Riboflavin
1995	Retrolental Fibroplasia
1996	Alveolar Process Atrophy
1997	Anemia
1998	Chylothorax
1999	Hemosiderosis
[truncated: 963 more rows]
