# Supplementary material for: Integrative Approach to Pain Genetics Identifies Pain Sensitivity Loci across Diseases
Source: PLoS Comput Biol. 2012 Jun 7;8(6):e1002538. doi: 10.1371/journal.pcbi.1002538 (PMC3369906; doi:10.1371/journal.pcbi.1002538)
Supplement: Table S2 — List of 121 diseases retrieved from GEO and AE that were also present in the DSPI. (XLS) [file pcbi.1002538.s006.xls]

## Sheet: Sheet1
Disease rank in DSPI	Disease Name	Tissue name	UMLS CUIs
68	Colitis, Mucous	Sigmoid colon	C0227391
139	Arthritis, Degenerative	Synovial Membrane	C0039099
156	Endometriosis	Endometrium	C0014180
170	Joint Diseases	Chondrocyte	C0225369
195	Spondylarthropathy	Peripheral blood mononuclear cell	C1321301
211	Myocardial Infarct	Myocardial tissue	C0027061
232	Sickle Cell Anemia	Pulmonary Artery; Endothelial cell	C0034052; C0225336
267	Actinic Keratosis	Skin tissue	C0684084
279	Arthritis	frontal cortex	C0016733
382	Osteolysis	Leukocyte - Lymphocyte - B-Lymphocyte - Plasma Cell (MMHCC)	C1522117
429	Fatigue Syndrome, Postviral	Peripheral blood mononuclear cell	C1321301
455	Rheumatoid Arthritis	Synovial Membrane; Peripheral blood mononuclear cell	C0039099; C1321301
496	Nephrolithiasis	Kidney	C0022646
566	Gastro-Esophageal Reflux	Esophageal Tissue	C1516966
578	Neurotrophic Muscular Atrophy	Muscle - Striated (Skeletal) (MMHCC)	C1522259
657	Cystitis	Bladder Tissue	C1511200
728	Dry Eye Syndromes	Eye - Lacrimal Gland (MMHCC)	C1522268
735	Mitochondrial Myopathy, Lactic Acidosis, Stroke-Like Episode	Muscle - Striated (Skeletal) (MMHCC)	C1522259
764	Colitis	Intestine - Large Intestine - Colon (MMHCC)	C1522281
983	Ewing's Tumor	Renal Tissue	C1514845
993	Synovioma	Synovial Membrane	C0039099
1009	Sclerosis, Disseminated	CNS - Spinal Cord (MMHCC); B Cell Lymphocyte	C1522592; C0004561
1031	Hemorrhagic Thrombocythemia	Megakaryocyte; Thrombocyte	C0025166; C0005821
1054	Myositis, Multiple	Muscle tissue	C0026845
1088	Marfan's Syndrome	Myocardial tissue; Fibroblast	C0027061; C0016030
1115	Crohn's Disease	Peripheral blood mononuclear cell; Intestine - Large Intestine - Colon (MMHCC); Sigmoid colon	C1321301; C1522281; C0227391
1207	Male Impotence	Penis Erectile Tissue	C1709494
1253	Primary Myocardial Diseases	Myocardial tissue	C0027061
1275	Bowel Diseases, Inflammatory	Colon	C0009368
1278	Small Cell Lung Cancer	Lung Tissue	C0819757
1300	Schaumann Disease	T lymphocyte; Blood Corpuscle	C0039194; C0005773
1311	Deficiency, Vitamin B 12	Bone marrow stem cell	C1511246
1347	Blood Pressure, High	Left Ventricle; CNS - Brain (MMHCC); Adrenal gland	C0225897; C1521713; C0001625
1454	MCTD	Lung Tissue	C0819757
1471	Childhood Muscular Dystrophy, Pseudohypertrophic	Muscle - Striated (Skeletal) (MMHCC); Muscle - Striated (Skeletal) - Diaphragm (MMHCC); Muscle tissue; Extraocular muscle	C1522259; C1522707; C0026845; C0028863
1491	Hypophosphatemia, X-Linked	Renal Tissue	C1514845
1509	Alexander's Disease	CNS - Brain - Olfactory Bulb (MMHCC)	C1522184
1526	Parkinson's Disease	Substantia Nigra; CNS - Brain (MMHCC)	C0038590; C1521713
1545	Diffuse Large-Cell Lymphoma	Hematopoietic and Lymphoid Cell	C1512385
1570	Adenoma, Hepatocellular	Hepatocyte	C0227525
1580	Thrombopenia	Megakaryocyte	C0025166
1582	Astroglioma	CNS - Brain (MMHCC)	C1521713
1591	Ulcerative Colitis	Peripheral blood mononuclear cell; Intestine - Large Intestine - Colon (MMHCC); Sigmoid colon	C1321301; C1522281; C0227391
1660	Hypercholesteremia	Hepatic Tissue	C0736268
1661	Atherosclerosis	Hepatic Tissue; Aorta Smooth Muscle Tissue	C0736268; C1706825
1674	Left Ventricular Hypertrophy	Myocardial tissue	C0027061
1681	Adenoma	Adrenal gland; Colon	C0001625; C0009368
1687	Dermatopolymyositis	Muscle - Striated (Skeletal) (MMHCC)	C1522259
1731	Werlhof Disease	T lymphocyte	C0039194
1742	Leukemia, Myeloid, Schilling Type	Blood monocyte	C0026473
1745	Infections, Meningococcal	Umbilical vein; Blood	C0041637; C0005767
1776	Ductal Carcinoma	Pancreas	C0030274
1780	Leukemia, Megakaryocytic	Megakaryocyte	C0025166
1857	Carcinoma, Non-Small Cell Lung	Lung Tissue; Bronchial epithelium	C0819757; C0599333
1902	Dehydration	CNS - Brain - Hypothalamus (MMHCC); Pituitary Gland; Hypothalamus	C1522183; C0032005; C0020663
1949	Obesity	Muscle - Striated (Skeletal) (MMHCC); Adipocyte; Adipose tissue	C1522259; C0206131; C0001527
1953	Auricular Fibrillation	Myocardial tissue	C0027061
1971	Diabetes Mellitus, Non Insulin Dependent	Skeletal muscle; Adipose tissue; Renal Tissue; Muscle - Striated (Skeletal) (MMHCC); Hepatic Tissue; pancreatic islet; Soleus Muscle; Muscle tissue; Endocrine Pancreas - Islet Cell of Langerhans - Beta Cell (MMHCC); Pancreas; Peripheral blood mononuclear cell	C0242692; C0001527; C1514845; C1522259; C0736268; C0022131; C0242694; C0026845; C1522214; C0030274; C1321301
1972	Rett's Syndrome	frontal cortex	C0016733
1981	Gehrig's Disease	CNS - Spinal Cord (MMHCC)	C1522592
2000	Arrhythmogenic Right Ventricular Cardiomyopathy-Dysplasia	Myocardial tissue	C0027061
2013	Bacterial Infection	macrophage; Leukocyte; Dendritic cell; Leukocyte - Monocyte - Macrophage (MMHCC); Peripheral blood mononuclear cell	C0024432; C0023516; C0011306; C1523993; C1321301
2031	Astrocytoma, Grade IV	Brain; CNS - Brain (MMHCC)	C0006104; C1521713
2066	Autoimmune Polyglandular Syndrome, Type 1	Thymic epithelial cell	C0229951
2067	Deficiency, Oxygen	Astrocyte; macrophage; Fibroblast; Heart	C0004112; C0024432; C0016030; C0018787
2081	Hypertrophy	Myocardial tissue	C0027061
2117	Heart Hypertrophy	cardiomyocyte; Myocardial tissue	C0225828; C0027061
2207	HTLV-III Infections	T lymphocyte; Peripheral blood mononuclear cell	C0039194; C1321301
2209	Diabetes Mellitus	Kidney	C0022646
2211	Leukemia, Myeloid, Acute, M3	Leukocyte - Monocyte (MMHCC); Blood neutrophil	C1522667; C0027950
2220	Barrett's Esophagus	Esophagus; Esophageal Tissue	C0014876; C1516966
2250	Infections, Protozoan	Intestinal Epithelium	C0226890
2252	Glaucoma	Astrocyte; Retina	C0004112; C0035298
2257	Granulomatous Disease, Chronic	Blood neutrophil	C0027950
2286	Preeclampsia	Placenta	C0032043
2295	Cystadenocarcinoma, Serous	Fallopian tube	C0015560
2300	Leukemia, B Cell, Chronic	PBL (peripheral blood lymphocyte)	C0599819
2303	Autoimmune Hepatitis	Hepatic Tissue	C0736268
2305	Cushing's Syndrome	Adrenal gland	C0001625
2314	Follicular Lymphoma, Giant	Hematopoietic and Lymphoid Cell	C1512385
2320	Leukemia-Lymphoma, T-Cell, Acute, HTLV-I-Associated	Blood monocyte	C0026473
2321	Infections, Pseudomonas	Lung Tissue	C0819757
2323	Carcinoma, Invasive Ductal, Breast	Mammary Epithelium	C0596882
2326	Cirrhosis, Liver	Hepatic Tissue; Liver	C0736268; C0023884
2329	Squamous Cell Carcinoma	Skin tissue; Lung Tissue	C0684084; C0819757
2334	Sclerocystic Ovarian Degeneration	Theca Cells; Adipose tissue; Skeletal muscle	C0039748; C0001527; C0242692
2337	Diabetic Nephropathy	Renal Tissue	C1514845
2347	Encephalomyelitides, Venezuelan Equine	Peripheral blood mononuclear cell	C1321301
2365	Lymphocytic Leukemia	T lymphocyte	C0039194
2368	Carcinoma, Transitional Cell	Urothelium	C0227598
2387	Hemorrhagic Shock	Lung Tissue	C0819757
2415	Asthma, Bronchial	CD4-Positive Lymphocyte; Epithelial Cell	C0039215; C0014597
2425	Wilms' Tumor	Renal Tissue	C1514845
2429	Premature Aging	Skin fibroblast	C1272578
2443	Influenza	B Cell Lymphocyte	C0004561
2449	Chronic Obstructive Pulmonary Disease	Muscle - Striated (Skeletal) - Diaphragm (MMHCC); Alveolar Macrophage; Bronchial epithelium; Lung Tissue; Lung	C1522707; C0085236; C0599333; C0819757; C0024109
2468	Myodystrophica	Muscle - Striated (Skeletal) (MMHCC); Myocardial tissue; Muscle - Striated (Skeletal) - Diaphragm (MMHCC); Musculus vastus lateralis	C1522259; C0027061; C1522707; C0224444
2475	Malignant Melanoma	Epidermis; Skin - Epidermis - Keratinocyte (MMHCC)	C0014520; C1522072
2482	Germinoblastoma	Hematopoietic and Lymphoid Cell	C1512385
2494	Diabetic Retinopathy	Retina	C0035298
2516	Respiratory Syndrome, Acute, Severe	Peripheral blood mononuclear cell	C1321301
2543	Leukemia, Myelocytic, Acute	Haematopoietic stem cell; Mononuclear Leukocyte	C0018956; C0023517
2552	Dysmyelopoietic Syndromes	Bone marrow stem cell	C1511246
2581	Anemia, Aplastic	Bone Marrow	C0005953
2614	Dermatitis, Eczematous	Integument	C0037267
2640	Alzheimer's Disease	Peripheral blood mononuclear cell; Cerebral cortex; Hippocampus; Entorhinal cortex; Middle temporal gyrus; Superior frontal gyrus	C1321301; C0007776; C0019564; C1289526; C0152310; C0152296
2646	PT-NANBH	Hepatocyte	C0227525
2699	Down's Syndrome	CNS - Brain - Cerebellum (MMHCC); CNS - Brain (MMHCC); Fetus; Brain	C1522278; C1521713; C0015965; C0006104
2721	Huntington's Chorea	Blood; CNS - Brain (MMHCC); Pheochromocytoma 12 Cell Line; Caudate Nucleus; frontal cortex; CNS - Brain - Cerebellum (MMHCC); Lymphocyte; CNS - Brain - Striatum (MMHCC); Brain	C0005767; C1521713; C0085262; C0007461; C0016733; C1522278; C0024264; C1521998; C0006104
2727	Werdnig Hoffman Disease	CNS - Spinal Cord (MMHCC)	C1522592
2754	Infections, Plasmodium	Blood	C0005767
2763	Fibroses, Pulmonary	Lung Tissue	C0819757
2772	Rod Cone Dystrophies	Retina	C0035298
2803	Hutchinson-Gilford Syndrome	Fibroblast	C0016030
2817	Turner's Syndrome	CNS - Brain (MMHCC)	C1521713
2883	Infections, Adenovirus	Fibroblast; Hepatic Tissue	C0016030; C0736268
2892	Age-Related Macular Degeneration	Fibroblast	C0016030
2924	Deficiency, Vitamin A	Hepatic Tissue	C0736268
2946	Fetal Alcohol Syndrome	Embryonic tissue	C0920502
2947	Deficiency, Folic Acid	Bone marrow stem cell	C1511246
2956	Growth Retardation, Intrauterine	Decidua basalis	C0230965
